# Supplementary material for: Identification of new channels by systematic analysis of the mitochondrial outer membrane
Source: PubMed Central journal article supplement (PMC5674900; doi:10.1083/jcb.201706043), 2017-11-06
Supplement: JCB_201706043_sm.pdf [file JCB_201706043_sm.pdf]

Krüger et al., <https://doi.org/10.1083/jcb.201706043>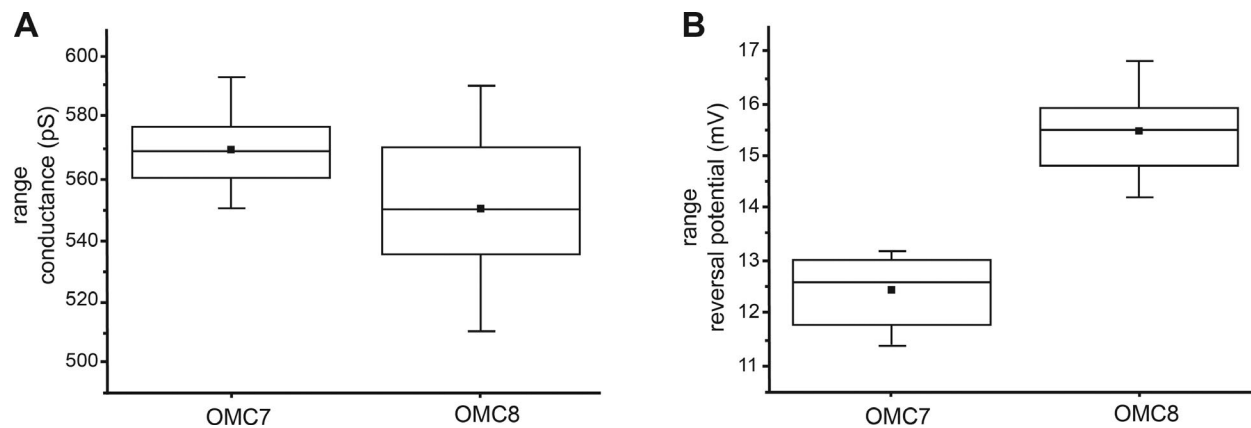

Figure S1. **Statistical analysis of conductance and reversal potential of OMC7 and OMC8.** (A) Box chart plots show the means (dots), medians (lines), 25th and 75th percentiles (bottom and top borders of the box), and minimum/maximum (whiskers) of the main conductance of OMC7 ( $n = 14$ ) and OMC8 ( $n = 11$ ). (B) Box chart plots of the reversal potential of OMC7 ( $n = 7$ ) and OMC8 ( $n = 5$ ).

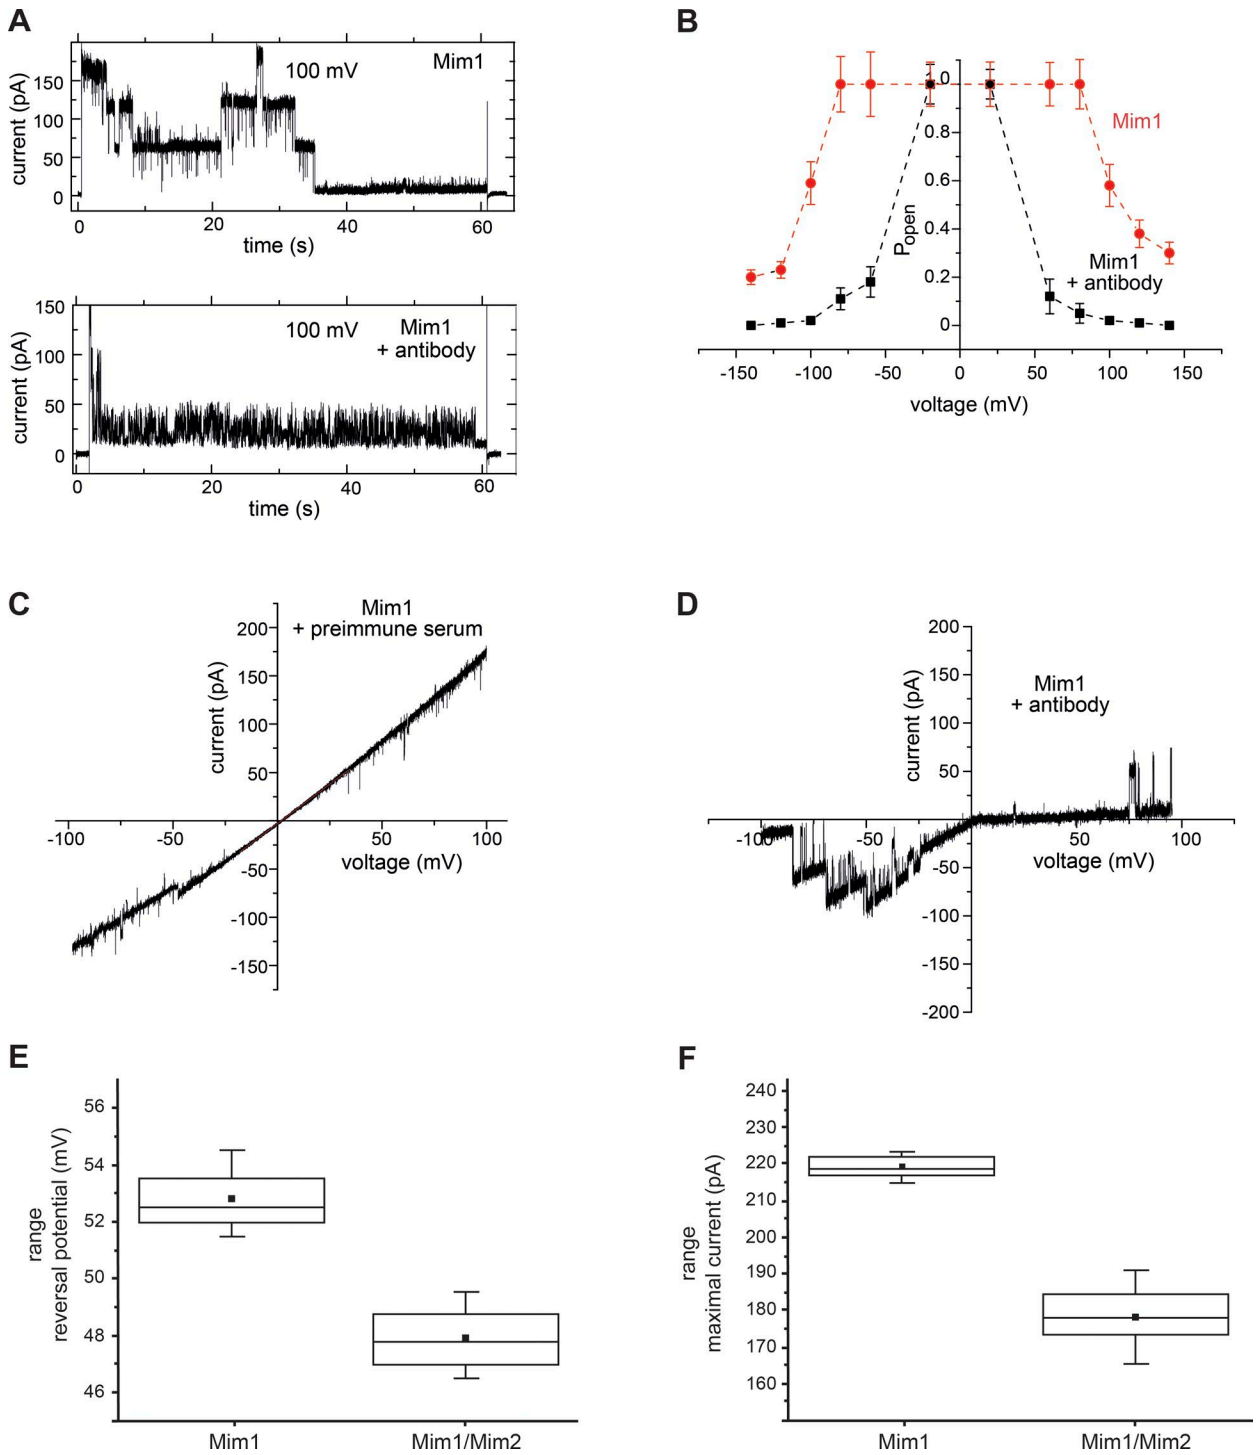

Figure S2. **Mim1-specific antibodies block the Mim1 channel.** (A) Current recordings of the Mim1 channel in the absence (top) or presence (bottom) of antibodies against Mim1. (B) Open probability of the Mim1 channel in the presence or absence of Mim1-specific antibodies. Depicted are mean values of three independent experiments with SD. (C and D) Current-voltage recordings of the Mim1 channel in the presence of preimmune serum (C) or Mim1-specific antibodies (D) under symmetrical buffer conditions. (E) Box chart plots show the means (dots), medians (lines), 25th and 75th percentiles (bottom and top borders of the box), and minimum/maximum (whiskers) of the reversal potential of Mim1 in the absence ( $n = 5$ ) or presence of Mim2 ( $n = 4$ ). (F) Box chart plot of the maximal current of Mim1 in the absence ( $n = 15$ ) or presence ( $n = 11$ ) of Mim2.

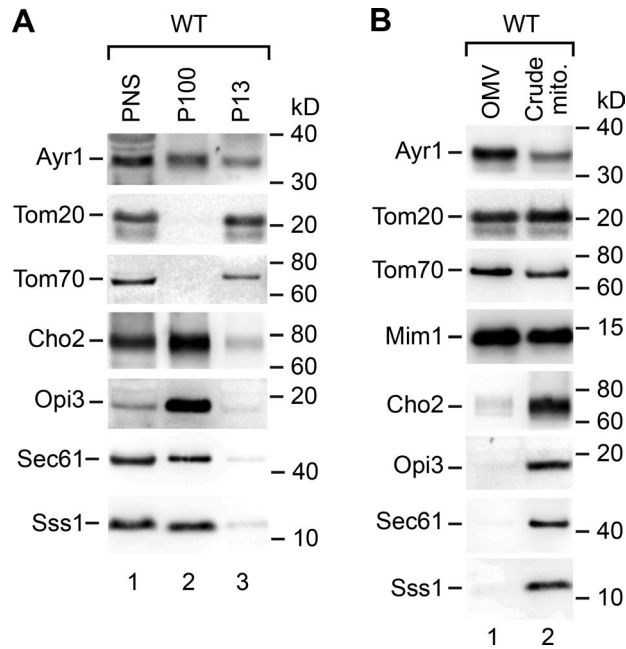

Figure S3. **Analysis of cellular fractions and mitochondrial outer membrane vesicles.** (A) The postnuclear supernatant (PNS) and fractions enriched for mitochondria (P13) or microsomes (P100) were analyzed by SDS-PAGE and immunodetection with the indicated antisera. (B) Highly purified mitochondrial outer membrane vesicles (OMVs) and a crude mitochondrial (Mito.) fraction including microsomal membranes were analyzed by SDS-PAGE and immunodetection with the indicated antisera. ER-localized proteins: Cho2, Opi3, Sec61, and Sss1.

Table S1. ***S. cerevisiae* strains used in this study**

| Strain                    | Genetic background                                                            | Number | Reference                  |
|---------------------------|-------------------------------------------------------------------------------|--------|----------------------------|
| YPH499 (WT)               | <i>MATa ura3-52 lys2-801_amber ade2-101_orchre trp1-Δ63 his3-Δ200 leu2-Δ1</i> | 1,501  | Sikorski and Hieter, 1989  |
| W303 (WT)                 | <i>SUC2 GAL+ mal mel ade2-1 can1-100 his3-11,15 leu2-3,112 trp1-1 ura3-1</i>  | 2,624  | Sorger et al., 2004        |
| <i>ayr1Δ</i>              | YPH499 <i>ayr1::HIS3</i>                                                      | 1,329  | This study                 |
| M3 (WT for <i>por1Δ</i> ) | <i>MATa lys2 his4 trp1 ade2 leu2 ura3</i>                                     | 1,280  | Blachly-Dyson et al., 1997 |
| <i>por1Δ</i>              | M3 <i>por1::LEU2</i>                                                          | 1,281  | Blachly-Dyson et al., 1997 |

Table S2. **List of constructs used for recombinant expression of proteins**

| Construct      | Plasmid | Affinity tag       | Source     |
|----------------|---------|--------------------|------------|
| Om45           | pET10C  | no His-tag         | This study |
| Scm4His        | pET10C  | C-terminal His tag | This study |
| Pth2His        | pET10C  | C-terminal His tag | This study |
| Mim1His        | pET19b  | N-terminal His tag | This study |
| Ayr1His        | pET10N  | N-terminal His tag | This study |
| Ayr1G20,22AHis | pET10N  | N-terminal His tag | This study |

Table S3. List of antisera used in this study

| Antibodies directed against                                         | Dilution                                 | Number    |
|---------------------------------------------------------------------|------------------------------------------|-----------|
| <i>S. cerevisiae</i> Ayr1/404 (purified full-length protein)        | 1:100 TBS (affinity purified antibodies) | B 219     |
| <i>S. cerevisiae</i> Mim1 (Cys-LKEISSPGTRGRVASKFL)                  | 1:500 TBS + 5% milk                      | GR 544-1  |
| <i>S. cerevisiae</i> Tom20 (purified protein comprising aa 32-183)  | 1:2,000 TBS + 5% milk                    | GR 3225-7 |
| <i>S. cerevisiae</i> Tom22 (purified protein comprising aa 1-97)    | 1:2,000 TBS + 5% milk                    | GR 3227-2 |
| <i>S. cerevisiae</i> Tom40 (purified full-length protein)           | 1:500 TBS + 5% milk                      | 168-5     |
| <i>S. cerevisiae</i> Tom70 (purified protein comprising aa 247-390) | 1:500 TBS + 5% milk                      | GR 657-3  |
| <i>S. cerevisiae</i> Tim23 (MSWLFGDKTPTDDAN-Cys)                    | 1:500 TBS + 5% milk                      | 133-4     |
| <i>S. cerevisiae</i> Ssq1 (Cys-DNLIRQRLELISKADIMIS)                 | 1:500 TBS + 5% milk                      | GR 1834   |
| <i>S. cerevisiae</i> Sec61 (Cys-AKEGGFTKNLVPGFSDLM)                 | 1:1,000 TBS + 5% milk                    | GR 760-7  |
| <i>S. cerevisiae</i> Sss1 (Cys-EKLVEAPVEFVREGTQF)                   | 1:500 TBS + 5% milk                      | GR 787-6  |
| <i>S. cerevisiae</i> Cho2 (Cys-AHVISHRAWDIKQTLDSL A)                | 1:250 TBS + 5% milk                      | GR 5072-3 |
| <i>S. cerevisiae</i> Opi3 (Ac-GIVRDMVYESALREQPTC)                   | 1:250 TBS + 5% milk                      | GR 1392-2 |

## References

- Blachly-Dyson, E., J. Song, W.J. Wolfgang, M. Colombini, and M. Forte. 1997. Multicopy suppressors of phenotypes resulting from the absence of yeast VDAC encode a VDAC-like protein. *Mol. Cell. Biol.* 17:5727–5738. <http://dx.doi.org/10.1128/MCB.17.10.5727>
- Sikorski, R.S., and P. Hieter. 1989. A system of shuttle vectors and yeast host strains designed for efficient manipulation of DNA in *Saccharomyces cerevisiae*. *Genetics*. 122:19–27.
- Sorger, D., K. Athenstaedt, C. Hrastnik, and G. Daum. 2004. A yeast strain lacking lipid particles bears a defect in ergosterol formation. *J. Biol. Chem.* 279:31190–31196. <http://dx.doi.org/10.1074/jbc.M403251200>
